# Supplementary material
Source: PubMed Central journal article supplement (PMC4720587)
Supplement: NIHMS708998-supplement-Supp_TableS1-S2.pdf [file NIHMS708998-supplement-Supp_TableS1-S2.pdf]

**Supplemental table 1: Extra renal items of the SLEDAI-2K at baseline\***

| <b>Extra-renal SLEDAI-2K Items</b> | <b>Number (Total = 82)</b> |
|------------------------------------|----------------------------|
| Seizure                            | 0                          |
| Psychosis                          | 0                          |
| Organic brain syndrome             | 1                          |
| Visual disturbance                 | 0                          |
| Cranial nerve disorder             | 1                          |
| Lupus headache                     | 0                          |
| CVA                                | 0                          |
| Vasculitis                         | 1                          |
| Arthritis                          | 14                         |
| Myositis                           | 0                          |
| Rash                               | 34                         |
| Alopecia                           | 12                         |
| Mucosal ulcers                     | 7                          |
| Pleurisy                           | 10                         |
| Pericarditis                       | 4                          |
| Low complement                     | 63                         |
| Increased DNA binding              | 59                         |
| Fever                              | 10                         |
| Thrombocytopenia                   | 4                          |
| Leukopenia                         | 12                         |

\* Extra-renal SLEDAI: Items of the Systemic Lupus Erythematosus Disease Activity Index -2K except the renal domain score

**Supplemental table 2: Renal item scores of clinical indices**

| <b>SLEDAI-2K Renal Items*</b>                                       | <b>N (Total = 83)</b>                        | <b>Mean ± Standard deviation (Range)</b> |
|---------------------------------------------------------------------|----------------------------------------------|------------------------------------------|
| Urinary casts (Heme-granular or red blood cell casts)               | 16                                           |                                          |
| Hematuria (> 5 red blood cells/high power field)                    | 51                                           |                                          |
| Proteinuria (> 0.5 gram/24 hours)                                   | 63                                           |                                          |
| Pyuria (> 5 white blood cells/high power field)                     | 33                                           |                                          |
|                                                                     |                                              |                                          |
| <b>SDI Renal Items**</b>                                            | <b>N (Total = 80)</b>                        |                                          |
| Estimated or measured glomerular filtration rate < 50%              | 2                                            |                                          |
| Proteinuria ≥ 3.5 grams/24hours                                     | 8                                            |                                          |
| End-stage renal disease (regardless of dialysis or transplantation) | 1                                            |                                          |
|                                                                     |                                              |                                          |
| <b>SLICC-RAS Renal Activity Score#</b>                              | <b>N (Total = 71)</b>                        |                                          |
| Proteinuria (0.5 – 1 grams/day)                                     | 12                                           |                                          |
| Proteinuria (> 1 – 3 grams/day)                                     | 15                                           |                                          |
| Proteinuria (> 3 grams/day)                                         | 14                                           |                                          |
| Urine red blood cell count (> 10/high power field)                  | 21                                           |                                          |
| Urine white blood cell count (> 10/high power field)                | 13                                           |                                          |
|                                                                     |                                              |                                          |
| <b>BILAG Renal Items†</b>                                           | <b>N (Total= 72-81)</b>                      |                                          |
| Systolic blood pressure (mmHg)                                      |                                              | 126 ± 16.3 (95-176)                      |
| Diastolic blood pressure (mmHg)                                     |                                              | 73.4 ± 12.6 (48-120)                     |
| Accelerated hypertension                                            | 8                                            |                                          |
| Urine dipstick protein                                              | 1+ (17)<br>2+ (9)<br>3+ (45)<br>Negative (8) |                                          |
| Urine albumin – creatinine ratio (mg/mg)                            |                                              | 5.06 ± 4.16 (2.8-14.7)                   |
| Urine protein – creatinine ratio (mg/mg)                            |                                              | 3.4 ± 3.2 (0.1-13.4)                     |
| 24 hour urine protein (grams)                                       |                                              | 3.6 ± 3.16 (0.21-10.98)                  |
| Nephrotic syndrome                                                  | 37                                           |                                          |
| Creatinine (plasma/serum) (mg/dL)                                   |                                              | 0.8 ± 0.6 (0.1-3.1)                      |
| GFR (calculated) (ml/min/1.73m <sup>2</sup> )                       |                                              | 106 ± 51.1 (2.4-234)                     |
| Active urinary sediment                                             | 45                                           |                                          |
| Active nephritis                                                    | 64                                           |                                          |

\* SLEDAI: renal domain score of the Systemic Lupus Erythematosus Disease Activity Index. Sum of the SLEDAI item scores for proteinuria > 0.5 gram/day, hematuria and pyuria (both > 5 cells/HPF and cellular casts

\*\* SDI: Systemic Lupus International Collaborating Clinics-Damage Index (score = 0 to maximum of 5). Based on glomerular filtration rate (GFR) < 50%, presence of end stage renal disease and proteinuria > 3.5 gram/day

# SLICC-RAS: Systemic Lupus International Collaborating Clinics-Renal Activity Score. Includes the SLEDAI-R items, except for cellular casts, scored on Likert scales

‡ BILAG: renal domain scores of the British Isles Lupus Assessment Group index. Sum of the BILAG item scores for proteinuria > 0.5 gram/day, hematuria and pyuria (both > 5 cells/HPF), cellular casts, blood pressure, the presence of accelerated hypertension, nephrotic syndrome, raised plasma creatinine concentrations, decreased GFR and for a kidney biopsy showing LN in the preceding 3-month period
